# Supplementary material for: Evaporation-induced nano- to micro-sized transformation of photoluminescent Cs4PbBr6 crystals
Source: Royal Society of Chemistry journal article supplement (doi:10.1039/d2tc01898e), 2022-01-01
Supplement: d2tc01898e1.pdf [file d2tc01898e1.pdf]

Supporting Information

**Evaporation-induced nano to micro-sized transformation of  
photoluminescent Cs<sub>4</sub>PbBr<sub>6</sub> crystals**

Hong Zhu, Yuexiao Pan,\* Hongzhou Lian, and Jun Lin\*

*<sup>a</sup>Nanomaterials and Chemistry Key Laboratory, Faculty of Chemistry and Materials Engineering, Wenzhou University, Zhejiang Province, Wenzhou 325027, P. R. China.  
Tel. & Fax: (+86) 577-8837-3017. E-mail: yxpan8@gmail.com;*

*<sup>b</sup>State Key Laboratory of Rare Earth Resource Utilization, Changchun Institute of Applied Chemistry, Chinese Academy of Sciences, Changchun 130022, P. R. China.  
Fax: +86-431-85698041; Tel: +86-431-85262031. E-mail: [jlin@ciac.ac.cn](mailto:jlin@ciac.ac.cn);*

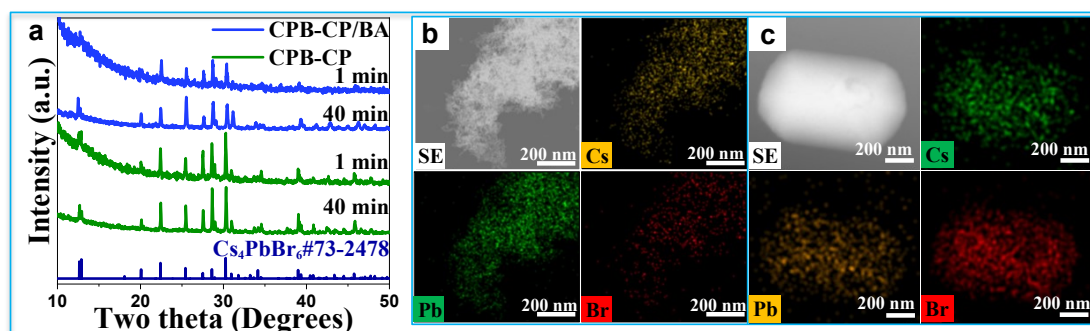

**Figure S1** (a) The XRD of fresh-centrifuged and dried CPB-CP and CPB-CP/BA samples with different drying time; The element mapping of CPB-CP/BA (b) NCs with blue luminescence and (c) MCs with green luminescence measured by TEM.

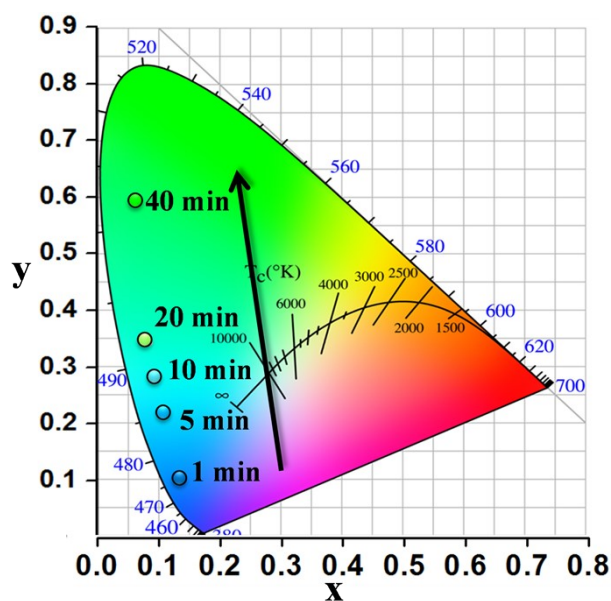

**Figure S2** The commission international de L'Eclairage (CIE) chromaticity coordinates of CPB-CP/BA NCs changing with the drying duration at room temperature in air.

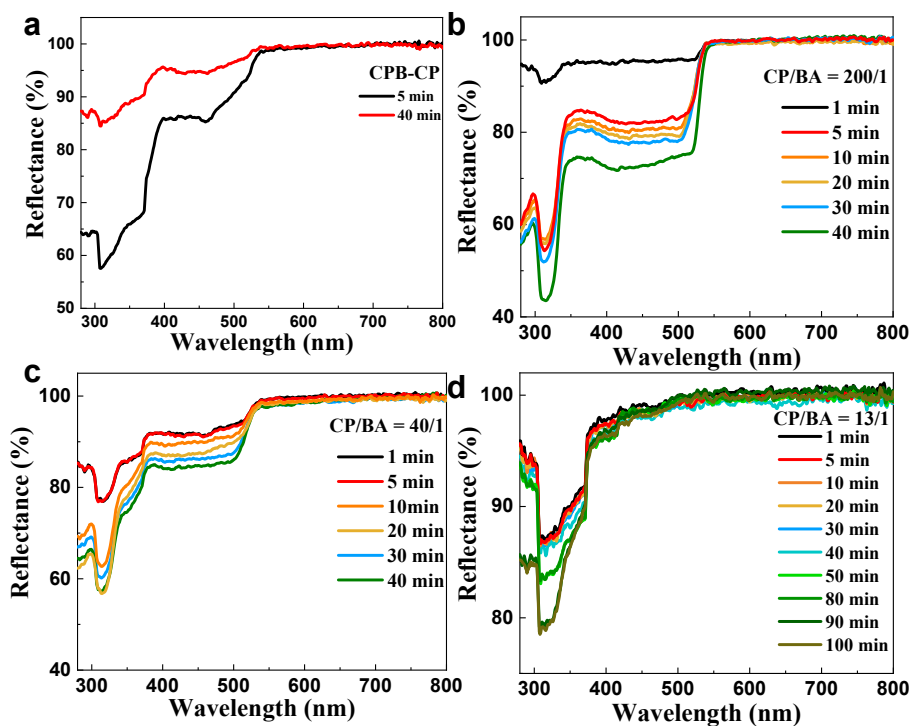

**Figure S3** The reflectance spectra of the CPB-CP MCs (a) and CPB-CP/BA crystals (b-d) with various ratios of CP/BA changing with the drying duration at room

temperature.

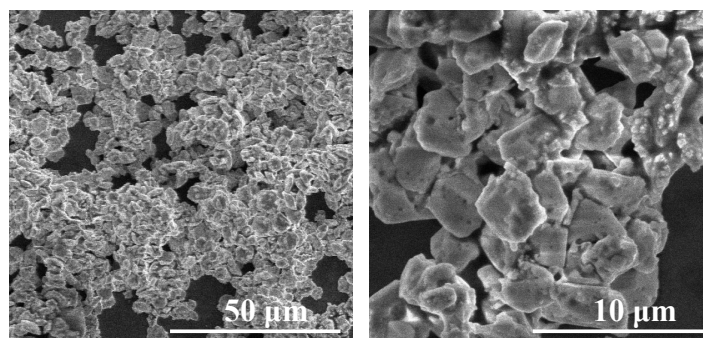

**Figure S4** The SEM images of CPB-CP MCs obtained in solution of pure CP solution.

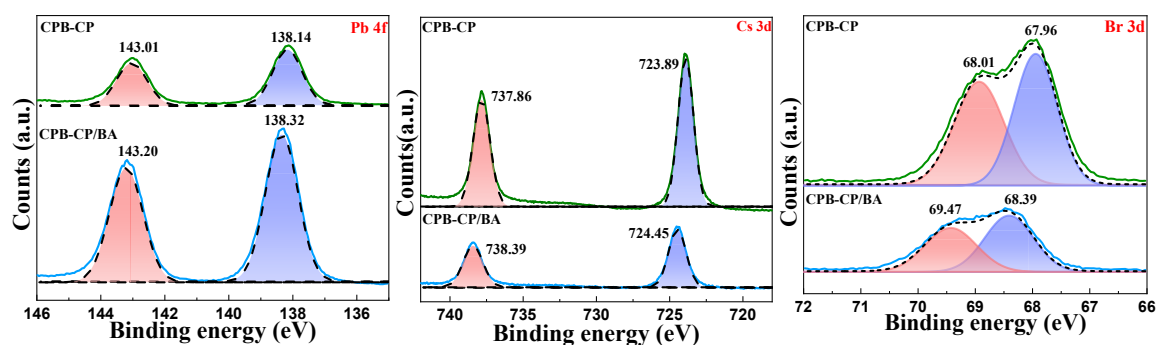

**Figure S5** The enlarged XPS of Pb, Cs, and Br elements in both the CPB-CP and CPB-CP/BA MCs.

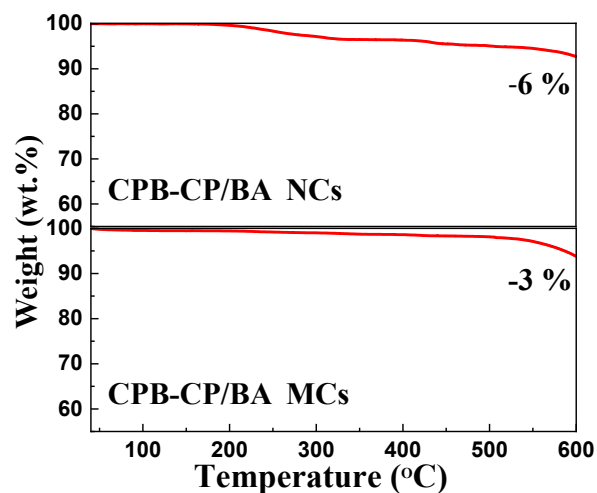

**Figure S6** The thermogravimetrics (TG) and differential thermal analysis (DTA) of CPB-CP/BA NCs and MCs.

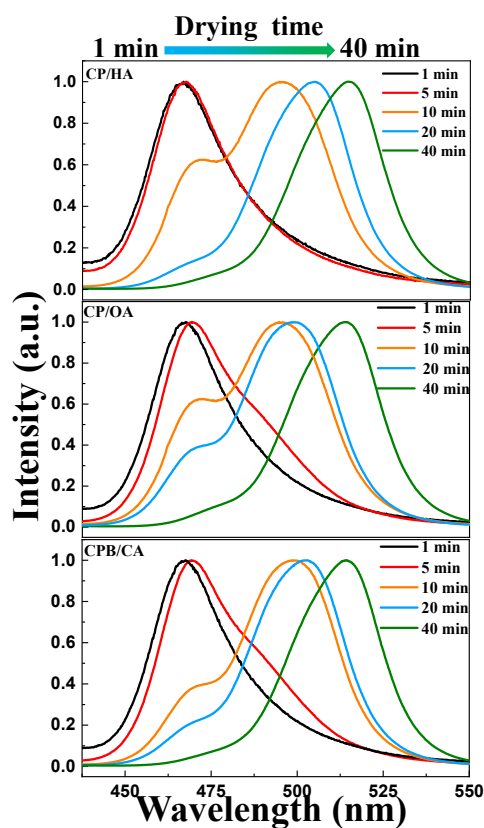

**Figure S7** The normalized time-dependent emission spectra of samples prepared with different organic amines.

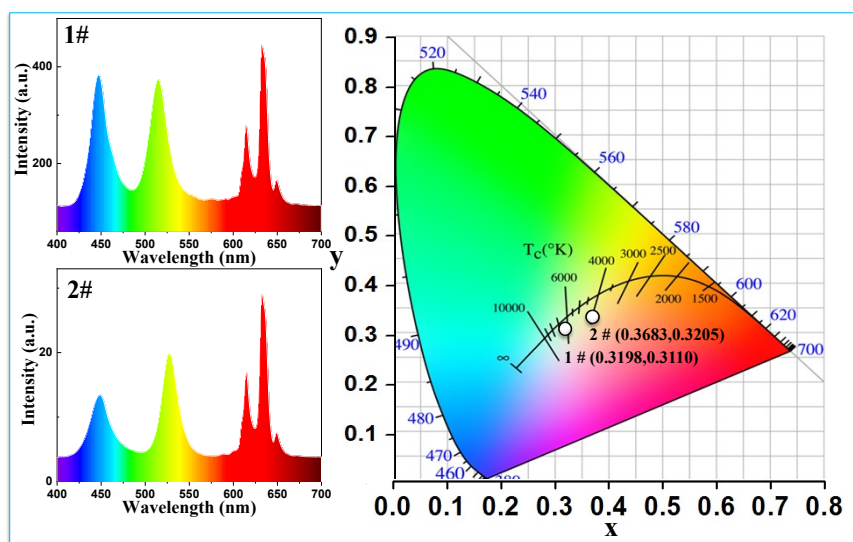

**Figure S8** The electroluminescence spectra of WLEDs fabricated with different ratios of tricolor components from blue chip, green CPB-CP/BA MCs, and red  $\text{K}_2\text{SiF}_6:\text{Mn}^{4+}$  phosphor.

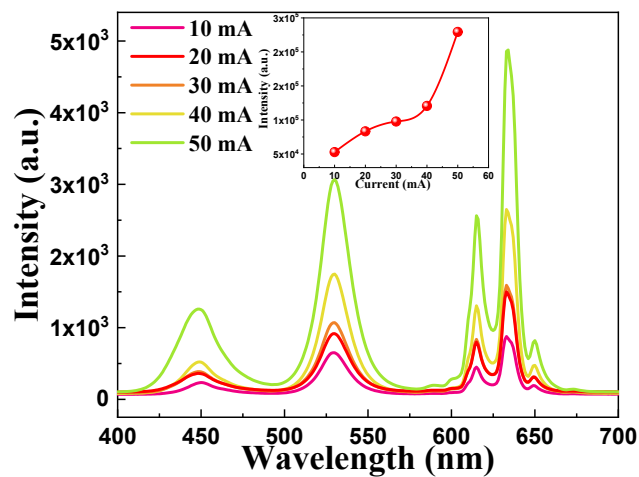

**Figure S9** The output electroluminescence spectra of a WLED consisting of blue chip, green CPB-CP/BA MCs, and red  $\text{K}_2\text{SiF}_6:\text{Mn}^{4+}$  phosphor, and the intensities of intensity as a function of driven current.

## Tables

**Table 1** FT-IR spectra of functional groups and wavenumbers corresponding to CPB-CP/BA.

| Compound         | Vibration                                                                           | Wavenumber (cm <sup>-1</sup> ) |
|------------------|-------------------------------------------------------------------------------------|--------------------------------|
| H <sub>2</sub> O | stretching vibration of O–H bond                                                    | 3428                           |
|                  | bending vibration of the O–H bond                                                   | 1644                           |
| CP               | deformation vibration of C–H bond                                                   | 3007 and 2906                  |
|                  | deformation of asymmetric and stretching vibrations originating from the C–H of CP. | 1451 and 903                   |
| BA               | C–C vibration can be assigned to the BA                                             | 1011                           |
|                  | The N–H out-of-plane bending vibration                                              | 755                            |

**Table 2** The color rendering index, luminous efficacy and chromaticity coordinates of WLED.

|    | Current (mA) | LE (lm W <sup>-1</sup> ) | CCT (K) | CRI | CIE Coordinates (x,y) |
|----|--------------|--------------------------|---------|-----|-----------------------|
| 1# | 20           | 10.35                    | 6298    | 79  | (0.3198,0.3110)       |
| 2# | 20           | 11.02                    | 3878    | 76  | (0.3683,0.3205)       |
